# Supplementary material
Source: Springer Nature journal article supplement (https://www.springermedizin.de/resource/supplementary/12882_2013_733_MOESM1_ESM.pdf/9454568)

# Pneumocystis jirovecii Pneumonia and GPA-related cavernae

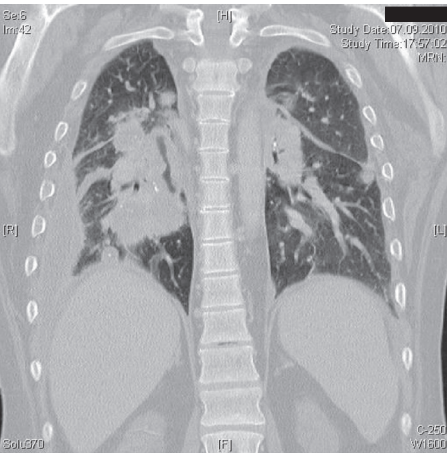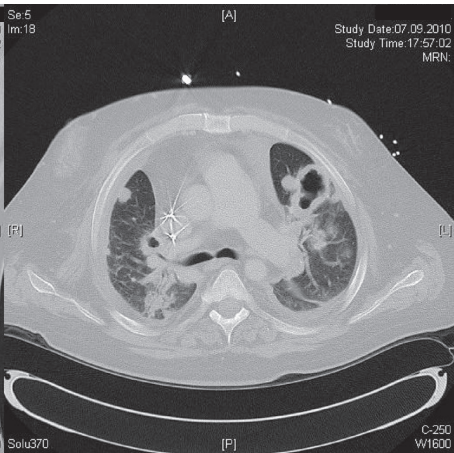

Supplement: MOESM1 [file 9454568]
